# Supplementary material for: Querkopf is a key marker of self-renewal and multipotency of adult neural stem cells
Source: Oxford University Press journal article supplement (doi:10.1242/jcs.077271), 2012-01-15
Supplement: jcs077271tables_s1-s18.pdf [file jcs077271tables_s1-s18.pdf]

**Supplementary Table 1:** Multiple comparisons and exact significance values (*p*-values) for data presented in Figure 2A.

| <i>Qkf</i> -GFP line 77  | GFP High | GFP<br>Medium High | GFP<br>Medium Low |
|--------------------------|----------|--------------------|-------------------|
| GFP Medium High          | <0.0001  |                    |                   |
| GFP Medium               | <0.0001  | 0.0008             |                   |
| GFP Low                  | <0.0001  | <0.0001            | 0.0536            |
| <i>Qkf</i> -GFP line 92  | GFP High | GFP<br>Medium High | GFP<br>Medium Low |
| GFP Medium High          | 0.0049   |                    |                   |
| GFP Medium               | 0.0020   | 0.1905             |                   |
| GFP Low                  | 0.0013   | 0.0756             | 0.04630           |
| <i>Qkf</i> -GFP line 151 | GFP High | GFP<br>Medium High | GFP<br>Medium Low |
| GFP Medium High          | 0.0003   |                    |                   |
| GFP Medium               | <0.0001  | 0.1154             |                   |
| GFP Low                  | <0.0001  | 0.0626             | 0.7523            |
| <i>Qkf</i> -GFP line 197 | GFP High | GFP<br>Medium High | GFP<br>Medium Low |
| GFP Medium High          | 0.0026   |                    |                   |
| GFP Medium               | 0.0006   | 0.2857             |                   |
| GFP Low                  | 0.0003   | 0.1348             | 0.6174            |
| <i>Qkf</i> -GFP line 217 | GFP High | GFP<br>Medium High | GFP<br>Medium Low |
| GFP Medium High          | 0.0003   |                    |                   |
| GFP Medium               | <0.0001  | 0.1111             |                   |
| GFP Low                  | <0.0001  | 0.0211             | 0.4132            |
| <i>Qkf</i> -GFP line 227 | GFP High | GFP<br>Medium High | GFP<br>Medium Low |
| GFP Medium High          | 0.0116   |                    |                   |
| GFP Medium               | 0.0060   | 0.4147             |                   |
| GFP Low                  | 0.0038   | 0.1822             | 0.5208            |
| <i>Qkf</i> -GFP line 238 | GFP High | GFP<br>Medium High | GFP<br>Medium Low |
| GFP Medium High          | 0.1150   |                    |                   |
| GFP Medium               | 0.0037   | 0.0529             |                   |
| GFP Low                  | 0.0012   | 0.0142             | 0.4189            |

Data were analyzed using one-factorial analysis of variance (ANOVA) followed by Fisher's post-hoc test.

**Supplementary Table 2:** Multiple comparisons and exact  $p$ -values for data presented in Figure 2B.

|                    | GFP High | GFP<br>Medium High | GFP<br>Medium Low | GFP low |
|--------------------|----------|--------------------|-------------------|---------|
| GFP Medium High    | <0.0001  |                    |                   |         |
| GFP Medium Low     | <0.0001  | 0.0003             |                   |         |
| GFP Low            | <0.0001  | <0.0001            | 0.1230            |         |
| Wild type (sorted) | <0.0001  | 0.3992             | 0.4329            | 0.1441  |

Data were analyzed using one-factorial ANOVA followed by Fisher's post-hoc test.

**Supplementary Table 3:** Multiple comparisons and exact *p*-values for data presented in Figure 2C.

|                 | GFP High | GFP<br>Medium High | GFP<br>Medium Low |
|-----------------|----------|--------------------|-------------------|
| GFP Medium High | <0.0001  |                    |                   |
| GFP Medium Low  | <0.0001  | 0.0013             |                   |
| GFP Low         | <0.0001  | 0.0002             | 0.1422            |

n = 3 *Qkf*-GFP sorts, 1 each from lines 151, 217, and 238; data were analyzed using one-factorial ANOVA followed by Fisher's post-hoc test.

**Supplementary Table 4:** Multiple comparisons and exact *p*-values for data presented in Figure 2D.

|                 | GFP High | GFP<br>Medium High | GFP<br>Medium Low |
|-----------------|----------|--------------------|-------------------|
| GFP Medium High | 0.226    |                    |                   |
| GFP Medium Low  | 0.688    | 1.000              |                   |
| GFP Low         | 0.208    | 0.003              | 0.009             |

Data were analyzed using one-factorial ANOVA followed by Bonferroni's post-hoc test.

**Supplementary Table 5:** Multiple comparisons and exact  $p$ -values for data presented in Figure 2E.

|                 | GFP High | GFP<br>Medium High | GFP<br>Medium Low |
|-----------------|----------|--------------------|-------------------|
| GFP Medium High | 0.383    |                    |                   |
| GFP Medium Low  | 0.403    | 1.000              |                   |
| GFP Low         | 0.931    | 0.026              | 0.033             |

n = 4 *Qkf*-GFP SVZ sorts, 1 each from lines 92, 151, 197, and 238; data were analyzed using one-factorial ANOVA followed by Bonferroni's post-hoc test.

**Supplementary Table 6:** Multiple comparisons and exact *p*-values for data presented in Figure 2F.

|                             | GFP High | GFP<br>Medium High | GFP<br>Medium Low | GFP low |
|-----------------------------|----------|--------------------|-------------------|---------|
| <b>GFP Medium High</b>      | <0.0001  |                    |                   |         |
| <b>GFP Medium Low</b>       | <0.0001  | 0.0800             |                   |         |
| <b>GFP Low</b>              | <0.0001  | 0.0010             | 1.000             |         |
| <b>Wild type (unsorted)</b> | <0.0001  | 0.7710             | 1.000             | 1.000   |

Data were analyzed using one-factorial ANOVA followed by Bonferroni's post-hoc test.

**Supplementary Table 7:** Multiple comparisons and exact  $p$ -values for data presented in Figure 3C.

|                        | GFP High | GFP<br>Medium High | GFP<br>Medium Low |
|------------------------|----------|--------------------|-------------------|
| <b>GFP Medium High</b> | 0.092    |                    |                   |
| <b>GFP Medium Low</b>  | 0.001    | 0.344              |                   |
| <b>GFP Low</b>         | <0.0001  | 0.211              | 1.000             |

n = 7 *Qkf*-GFP sorts, 1 each from lines 92, 151, 197, 217, and 238, and 2 sorts from line 227; data were analyzed using one-factorial ANOVA followed by Bonferroni's post-hoc test.

**Supplementary Table 8:** Multiple comparisons and exact  $p$ -values for data presented in Figure 3D.

|                 | GFP High | GFP<br>Medium High | GFP<br>Medium Low |
|-----------------|----------|--------------------|-------------------|
| GFP Medium High | <0.0001  |                    |                   |
| GFP Medium Low  | <0.0001  | <0.0001            |                   |
| GFP Low         | <0.0001  | 0.0483             | 0.8073            |

n = 4 *Qkf*-GFP SVZ sorts, 1 each from lines 92, 227, and 2 sorts from line 197; *Qkf*-GFP<sup>Hi</sup> n = 583 neurospheres; *Qkf*-GFP<sup>MedHi</sup> n = 546 neurospheres; *Qkf*-GFP<sup>MedLo</sup> n = 233 neurospheres; *Qkf*-GFP<sup>Lo</sup> n = 26 neurospheres; data were analyzed using one-factorial ANOVA followed by Fisher's post-hoc test.



**Supplementary Table 9:** Multiple comparisons and exact *p*-values for data Figure 3E.

|                 | GFP High | GFP<br>Medium High | GFP<br>Medium Low |
|-----------------|----------|--------------------|-------------------|
| GFP Medium High | 0.5289   |                    |                   |
| GFP Medium Low  | 0.1641   | 0.4207             |                   |
| GFP Low         | 0.0066   | 0.0219             | 0.0975            |

n = 4 *Qkf*-GFP sorts, 1 each from lines 92, and 197, and 2 sorts from lines 227; data were analyzed using one-factorial ANOVA followed by Fisher's post-hoc test.

**Supplementary Table 10:** Multiple comparisons and exact  $p$ -values for data presented in Figure 3F.

|                        | GFP High | GFP<br>Medium High | GFP<br>Medium Low |
|------------------------|----------|--------------------|-------------------|
| <b>GFP Medium High</b> | 1.000    |                    |                   |
| <b>GFP Medium Low</b>  | 1.000    | 1.000              |                   |
| <b>GFP Low</b>         | 0.896    | 0.418              | 0.137             |

n = 3 *Qkf*-GFP sorts, 1 each from lines 197, 217, and 238; data were analyzed using one-factorial ANOVA followed by Bonferroni's post-hoc test.

**Supplementary Table 11:** Multiple comparisons and exact  $p$ -values for data presented in Figure 3G.

|                 | GFP High | GFP<br>Medium High | GFP<br>Medium Low |
|-----------------|----------|--------------------|-------------------|
| GFP Medium High | 0.019    |                    |                   |
| GFP Medium Low  | 0.016    | 1.000              |                   |
| GFP Low         | 1.000    | 0.117              | 0.094             |

n = 3 *Qkf*-GFP sorts, 1 each from lines 92, 197, and 238; data were analyzed using one-factorial ANOVA followed by Bonferroni's post-hoc test.

**Supplementary Table 12:** Multiple comparisons and exact  $p$ -values for data presented in Figure 4A.

|                 | GFP High | GFP<br>Medium High | GFP<br>Medium Low |
|-----------------|----------|--------------------|-------------------|
| GFP Medium High | 0.023    |                    |                   |
| GFP Medium Low  | <0.0001  | 0.004              |                   |
| GFP Low         | <0.0001  | <0.0001            | 0.169             |

n = 3 *Qkf*-GFP sorts, 1 each from lines 92, 217, and 227; data were analyzed using one-factorial ANOVA followed by Bonferroni's post-hoc test.

**Supplementary Table 13:** Multiple comparisons and exact  $p$ -values for data presented in Figure 4B.

|                 | GFP High | GFP<br>Medium High | GFP<br>Medium Low |
|-----------------|----------|--------------------|-------------------|
| GFP Medium High | 0.8040   |                    |                   |
| GFP Medium Low  | <0.0001  | <0.0001            |                   |
| GFP Low         | <0.0001  | <0.0001            | 0.0992            |

n = 6 *Qkf*-GFP sorts, 1 each from lines 77 and 197, and 2 sorts from lines 151 and 227 each; data were analyzed using one-factorial ANOVA followed by Fisher's post-hoc test.

**Supplementary Table 14:** Multiple comparisons and exact  $p$ -values for data presented in Figure 4C.

|                 | GFP High | GFP<br>Medium High | GFP<br>Medium Low |
|-----------------|----------|--------------------|-------------------|
| GFP Medium High | 0.0102   |                    |                   |
| GFP Medium Low  | <0.0001  | 0.0001             |                   |
| GFP Low         | <0.0001  | <0.0001            | 0.6582            |

n = 3 *Qkf*-GFP sorts, 1 each from lines 151, 217, and 227; data were analyzed using one-factorial ANOVA followed by Fisher's post-hoc test.

**Supplementary Table 15:** Multiple comparisons and exact  $p$ -values for data described in Figure 4D.

|                 | GFP High | GFP<br>Medium High | GFP<br>Medium Low |
|-----------------|----------|--------------------|-------------------|
| GFP Medium High | 0.0728   |                    |                   |
| GFP Medium Low  | 0.0149   | 0.3360             |                   |
| GFP Low         | 0.0099   | 0.2296             | 0.7887            |

n = 3 *Qkf*-GFP sorts, 1 each from lines 77, 151, and 227; data were analyzed using one-factorial ANOVA followed by Fisher's post-hoc test.

**Supplementary Table 16:** Multiple comparisons and exact  $p$ -values for data presented in Figure 4E.

|                 | GFP High | GFP<br>Medium High | GFP<br>Medium Low |
|-----------------|----------|--------------------|-------------------|
| GFP Medium High | 0.9065   |                    |                   |
| GFP Medium Low  | 0.0014   | 0.0016             |                   |
| GFP Low         | 0.6911   | 0.7786             | 0.0023            |

n = 3 *Qkf*-GFP sorts, 1 each from lines 151, 217, and 227; data were analyzed using one-factorial ANOVA followed by Fisher's post-hoc test.



**Supplementary Table 17:** Multiple comparisons and exact  $p$ -values for data presented in Figure 4F.

|                 | GFP High | GFP<br>Medium High | GFP<br>Medium Low |
|-----------------|----------|--------------------|-------------------|
| GFP Medium High | 1.000    |                    |                   |
| GFP Medium Low  | 0.002    | 0.004              |                   |
| GFP Low         | 0.924    | 0.425              | <0.0001           |

n = 3 *Qkf*-GFP sorts, 1 each from lines 197, 227, and 238; data were analyzed using one-factorial ANOVA followed by Bonferroni's post-hoc test.

**Supplementary Table 18:** Summary of results showing correlation between high *Qkf*-GFP expression and neural stem cell characteristics.

|                                                      | GFP High                    | GFP<br>Medium High          | GFP<br>Medium Low              | GFP Low                     |
|------------------------------------------------------|-----------------------------|-----------------------------|--------------------------------|-----------------------------|
| <b>Bulk NSp Assay<br/>(per event)</b>                | 4.42 ± 0.41%                | 1.59 ± 0.09%                | 0.49 ± 0.06%                   | 0.034 ± 0.01%               |
| <b>Clonal NSp<br/>Assay</b>                          | 3.58 ± 0.08%                | 1.37 ± 0.23%                | 0.347 ± 0.17%                  | 0.0 ± 0.0%                  |
| <b>NSp formation<br/>(per live cell)</b>             | 25.84 ± 2.39%               | 7.24 ± 0.40%                | 2.67 ± 0.33%                   | 0.25 ± 0.09%                |
| <b>Passaging<br/>Ability</b>                         | > 12 passages               | > 12 passages               | < 3 passages <sup>1</sup>      | < 3 passages                |
| <b>Collagen assay<sup>2</sup><br/>- NSC colonies</b> | 0.123 ± 0.030%              | 0.057 ± 0.019%              | 0.006 ± 0.002%                 | 0.0 ± 0.0%                  |
| <b>Primary NSp<br/>volume</b>                        | 0.96 ± 0.03 mm <sup>3</sup> | 0.61 ± 0.02 mm <sup>3</sup> | 0.41 ± 0.02 mm <sup>3</sup>    | 0.38 ± 0.07 mm <sup>3</sup> |
| <b>Short-term<br/>BrdU<sup>Pos</sup></b>             | 16.93 ± 3.35%               | 14.30 ± 4.47%               | 10.93 ± 0.98%                  | 3.65 ± 0.76%                |
| <b>Ki67 positive</b>                                 | 21.12 ± 3.11%               | 23.55 ± 3.41%               | 27.05 ± 4.09%                  | 13.35 ± 3.07%               |
| <b>Long-term<br/>BrdU<sup>Pos</sup></b>              | 10.03 ± 2.05%               | 2.85 ± 1.33%                | 2.60 ± 0.57%                   | 7.89 ± 1.82%                |
| <b>GFAP<sup>Pos</sup></b>                            | 11.92 ± 0.36%               | 8.26 ± 0.49%                | 3.44 ± 1.07%                   | 1.00 ± 0.39%                |
| <b>HSA<sup>Lo</sup> staining</b>                     | 78.30 ± 5.75%               | 81.22 ± 4.69%               | 37.42 ± 4.17%                  | 32.47 ± 7.95%               |
| <b>SSEA-1/LeX<sup>Pos</sup></b>                      | 50.00 ± 6.18%               | 34.93 ± 1.42%               | 4.30 ± 0.58%                   | 2.23 ± 0.30%                |
| <b>CD133<sup>Pos</sup></b>                           | 7.00 ± 2.61%                | 3.31 ± 0.28%                | 1.21 ± 0.22%                   | 0.69 ± 0.28%                |
| <b>PSA-NCAM<sup>Pos</sup></b>                        | 12.92 ± 3.10%               | 13.69 ± 2.42%               | 43.37 ± 4.95%                  | 15.53 ± 6.38%               |
| <b>Nestin<sup>Pos</sup></b>                          | 11.64 ± 0.66%               | 12.96 ± 0.51                | 27.04 ± 5.05%                  | 7.54 ± 2.08%                |
| <b>Differentiation<br/>Potential</b>                 | All lineages                | All lineages                | Astrocytes and<br>Neurons only | Astrocytes only             |

<sup>1</sup>One culture lasted until passage 6, but had very few proliferating cells after passage 4.

<sup>2</sup>NeuroCult Collagen Colony Forming Assay (StemCell Technologies)

All data are represented as mean ± SEM; NSp = neurosphere.
